## CORRECTION

# Correction: Airbnb and neighborhood crime: The incursion of tourists or the erosion of local social dynamics?

The *PLOS ONE* Staff

## Notice of republication

This article was republished on July 21, 2021 to correct errors in the article text that were introduced during the typesetting process. The publisher apologizes for the error. The originally published, uncorrected article and the republished, corrected articles are provided here for reference.

## Supporting information

### S1 File. Originally published, uncorrected article.

(PDF)

### S2 File. Republished, corrected article.

(PDF)

## Reference

1. Ke L, O'Brien D T., Heydari B (2021) Airbnb and neighborhood crime: The incursion of tourists or the erosion of local social dynamics? *PLoS ONE* 16(7): e0253315. <https://doi.org/10.1371/journal.pone.0253315> PMID: 34260607

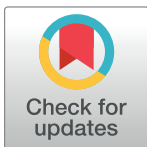

## OPEN ACCESS

**Citation:** The *PLOS ONE* Staff (2021) Correction: Airbnb and neighborhood crime: The incursion of tourists or the erosion of local social dynamics? *PLoS ONE* 16(12): e0261886. <https://doi.org/10.1371/journal.pone.0261886>

**Published:** December 21, 2021

**Copyright:** © 2021 The PLOS ONE Staff. This is an open access article distributed under the terms of the [Creative Commons Attribution License](https://creativecommons.org/licenses/by/4.0/), which permits unrestricted use, distribution, and reproduction in any medium, provided the original author and source are credited.
